# Supplementary material for: The gut microbiome in dogs with congestive heart failure: a pilot study
Source: PubMed Central journal article supplement (PMC7426839; doi:10.1038/s41598-020-70826-0), 2020-08-13

## The gut microbiome in dogs with congestive heart failure: A pilot study

Joonbum Seo<sup>1\*</sup>, Linda Matthewman<sup>2</sup>, Dong Xia<sup>3</sup>, Jenny Wilshaw<sup>1</sup>, Yu-Mei Chang<sup>3</sup>,

David John Connolly<sup>1</sup>

### Supplementary Tables

**Supplementary Table S1.** Demographic characteristics with further subclassification of congestive heart failure (CHF). The p value is from comparison of control, LCHF and RCHF groups. BiCHF was not included due to the small sample size. Differences seen on post-hoc analysis are annotated as a,b,c. \*One dog in the left CHF (LCHF) group had a missing muscle condition score. \*\*Urea and creatinine were only available for 10 dogs with LCHF, 11 dogs with right CHF (RCHF) and 2 dogs with biventricular CHF (BiCHF). \*\*\*The duration of CHF and diuretic dose were only compared between the LCHF and RCHF groups. BCS, body condition score, JRT, Jack Russell Terrier, James Wb, James Wellbeloved, Royal Canin AM, Royal Canin Adult Maintenance. The results are displayed as median [25<sup>th</sup>, 75<sup>th</sup> percentiles].

|                              | Control (n=15)                | LCHF (n=16)                   | RCHF (n=15)                   | BiCHF (n=4)      | p value          |
|------------------------------|-------------------------------|-------------------------------|-------------------------------|------------------|------------------|
| Age (years)                  | 8.0 [6.8-10.0]                | 10.8 [9.1-11.8] <sub>a</sub>  | 8.8 [2.2-10.4] <sub>a</sub>   | 10.4 [8.6-11.4]  | <b>0.012</b>     |
| Sex                          |                               |                               |                               |                  | 0.501            |
| Female (%)                   | 7 (46.7%)                     | 4 (25%)                       | 6 (40%)                       | 0                |                  |
| Neutered:Entire              | 7:0                           | 4:0                           | 6:0                           | -                |                  |
| Male (%)                     | 8 (53.3%)                     | 12 (75%)                      | 9 (60%)                       | 4 (100%)         |                  |
| Neutered:Entire              | 5:3                           | 9:3                           | 2:7                           | 4:0              |                  |
| Body weight (kg)             | 20.3 [12.1-33.0] <sub>a</sub> | 7.9 [4.5-11.7] <sub>a,b</sub> | 42.6 [27.0-52.0] <sub>b</sub> | 25.5 [10.3-40.8] | <b>&lt;0.001</b> |
| BCS (/9)                     | <sub>a,b</sub>                | <sub>a</sub>                  | <sub>b</sub>                  |                  | <b>0.007</b>     |
| 1/9                          | 0                             | 0                             | 1 (6.7%)                      | 0                |                  |
| 2/9                          | 0                             | 0                             | 3 (20.0%)                     | 1 (25.0%)        |                  |
| 3/9                          | 0                             | 3 (18.8%)                     | 4 (26.7%)                     | 1 (25.0%)        |                  |
| 4/9                          | 3 (20.0%)                     | 9 (56.3%)                     | 3 (20.0%)                     | 2 (50.0%)        |                  |
| 5/9                          | 6 (40.0%)                     | 3 (18.8%)                     | 3 (20.0%)                     | 0                |                  |
| 6/9                          | 6 (40.0%)                     | 1 (6.3%)                      | 1 (6.7%)                      | 0                |                  |
| Muscle condition*            | <sub>a,b</sub>                | <sub>a,c</sub>                | <sub>b,c</sub>                |                  | <b>&lt;0.001</b> |
| Normal                       | 15 (100%)                     | 6 (37.5%)                     | 2 (13.3%)                     | 0                |                  |
| Mild                         | 0                             | 7 (43.8%)                     | 2 (13.3%)                     | 2 (50%)          |                  |
| Moderate                     | 0                             | 2 (12.5%)                     | 7 (46.7%)                     | 0                |                  |
| Severe                       | 0                             | 6 (37.5%)                     | 4 (26.7%)                     | 2 (50%)          |                  |
| Appetite                     | <sub>a,b</sub>                | <sub>a,c</sub>                | <sub>b,c</sub>                |                  | <b>&lt;0.001</b> |
| Normal                       | 15 (100%)                     | 11 (68.8%)                    | 2 (13.3%)                     | 0                |                  |
| Reduced                      | 0                             | 5 (31.3%)                     | 13 (86.7%)                    | 4 (100%)         |                  |
| Urea (mmol/L)**              | -                             | 6.0 (±1.4)                    | 6.0 (±4.9)                    | 3.9 (±0.3)       | 0.950            |
| Creatinine (µmol/L)**        | -                             | 97.2 (±26.5)                  | 123.8 (±70.7)                 | 106.1 (±26.5)    | 0.154            |
| Duration of CHF (weeks)***   | 0                             | 18.9 [4.3-34.0]               | 3 [2.0-8.6]                   | 13.5 [4.5-45.8]  | <b>0.036</b>     |
| Medication                   |                               |                               |                               |                  |                  |
| Diuretic dose*** (mg/kg/day) | -                             | 5.0 [3.5-6.9]                 | 3.8 [2.6-4.4]                 | 8.2 [4.8-9.9]    | 0.172            |
| Furosemide                   | 0                             | 13 (81.3%)                    | 12 (80.0%)                    | 3 (75.0%)        | -                |
| Torsemide                    | 0                             | 3 (18.8%)                     | 0                             | 1 (25.0%)        | -                |
| Pimobendan                   | 0                             | 16 (100%)                     | 13 (86.7%)                    | 4 (100%)         | -                |
| Benazepril                   | 0                             | 12 (75.0%)                    | 10 (66.7%)                    | 3 (75.0%)        | -                |
| Spironolactone               | 0                             | 12 (75.0%)                    | 8 (53.3%)                     | 3 (75.0%)        | -                |
| Fish Oil                     | 0                             | 0                             | 2 (13.3%)                     | 2 (50.0%)        | -                |
| Diltiazem/ Digoxin           | 0                             | 1 (6.3%)                      | 7 (46.7%)                     | 1 (25.0%)        | -                |

|                            |            |            |            |           |        |
|----------------------------|------------|------------|------------|-----------|--------|
| Breeds (%)                 | a          | a,b        | b          |           | <0.001 |
| -Small breeds              | 4 (26.7%)  | 14 (87.5%) | 2 (13.3%)  | 2 (50.0%) |        |
| Boston Terrier             | 0          | 0          | 1          | 0         |        |
| Brussell Griffon           | 0          | 1          | 0          | 0         |        |
| Chihuahua                  | 0          | 3          | 0          | 0         |        |
| CKCS                       | 0          | 6          | 0          | 2         |        |
| Cocker Spaniel             | 2          | 0          | 0          | 0         |        |
| Daschund                   | 0          | 1          | 0          | 0         |        |
| Havanese                   | 0          | 1          | 0          | 0         |        |
| JRT                        | 1          | 0          | 1          | 0         |        |
| Pug                        | 1          | 0          | 0          | 0         |        |
| Yorkshire Terrier          | 0          | 2          | 0          | 0         |        |
| -Large breeds              | 11 (73.3%) | 2 (12.5%)  | 13 (86.7%) | 2 (50.0%) |        |
| Crossbred                  | 4          | 1          | 2          | 1         |        |
| English Bulldog            | 1          | 0          | 1          | 0         |        |
| English Mastiff            | 0          | 0          | 0          | 0         |        |
| French Mastiff             | 0          | 0          | 4          | 0         |        |
| Golden Retriever           | 0          | 0          | 2          | 0         |        |
| Labradoodle                | 1          | 1          | 1          | 0         |        |
| Labrador                   | 4          | 0          | 1          | 1         |        |
| Newfoundland               | 1          | 0          | 2          | 0         |        |
| <b>Dietary information</b> |            |            |            |           |        |
| Human food                 | 5 (33.3%)  | 11 (68.8%) | 9 (60.0%)  | 3 (75.0%) | 0.122  |
| Dog food                   | 15 (100%)  | 15 (93.8%) | 14 (93.3%) | 4 (100%)  | 0.602  |
| Raw food                   | 2 (13.3%)  | 1 (6.3%)   | 1 (6.7%)   | 1 (25.0%) | 0.739  |
| Main diet brand/type       |            |            |            |           | 0.405  |
| Any dog food               | 3 (20.0%)  | 9 (56.3%)  | 5 (33.3%)  | 2 (50.0%) |        |
| Arden Grange               | 1 (6.7%)   | 0          | 1 (6.7%)   | 0         |        |
| Barking Heads              | 0          | 0          | 1 (6.7%)   | 0         |        |
| Cesar                      | 0          | 1 (6.3%)   | 0          | 0         |        |
| Canagan                    | 1 (6.7%)   | 0          | 0          | 0         |        |
| Homecooked                 | 0          | 1 (6.3%)   | 3 (20.0%)  | 1 (25.0%) |        |
| James Wb                   | 1 (6.7%)   | 2 (12.5%)  | 0          | 0         |        |
| Irish                      | 0          | 0          | 0          | 1 (25.0%) |        |
| Lily's Kitchen             | 1 (6.7%)   | 1 (6.3%)   | 0          | 0         |        |
| Purina Omega               | 1 (6.7%)   | 0          | 1 (6.7%)   | 0         |        |
| Royal Canin AM             | 1 (6.7%)   | 0          | 0          | 0         |        |
| Unknown brand              | 3 (20.0%)  | 2 (12.5%)  | 3 (20.0%)  | 0         |        |
| Tails.com                  | 1 (6.7%)   | 0          | 0          | 0         |        |
| Wainwright's               | 2 (13.3%)  | 0          | 0          | 0         |        |

**Supplementary Table S2.** Relative abundance % of bacterial species in control and congestive heart failure (CHF) groups. The results are displayed as median [25<sup>th</sup>, 75<sup>th</sup> percentiles]. Bacterial species (spp.) with clinically significant differential abundance are annotated using bold text.

| Bacterial species                               | Control (n=15)       | CHF (n=35)           | p value      |
|-------------------------------------------------|----------------------|----------------------|--------------|
| <b>Actinobacteria</b>                           |                      |                      |              |
| <i>Corynebacterium</i> unclassified spp. 1      | 0 [0-0]              | 0 [0-0]              | 0.091        |
| <i>Corynebacterium</i> unclassified spp. 2      | 0 [0-0]              | 0 [0-0]              | 0.127        |
| <i>Bifidobacterium</i> unclassified spp.        | 0 [0-0]              | 0 [0-0]              | 0.988        |
| <i>Collinsella</i> unclassified spp.            | 0 [0-0]              | 0 [0-0.02]           | 0.087        |
| <i>Collinsella stercoris</i>                    | 0.58 [0.17-1.63]     | 0.61 [0.17-1.41]     | 0.992        |
| <i>Slackia</i> unclassified spp.                | 0.02 [0-0.05]        | 0.03 [0.01-0.07]     | 0.462        |
| <b>Bacteroidetes</b>                            |                      |                      |              |
| [ <i>Paraprevotellaceae</i> ] unclassified spp. | 0 [0-0.11]           | 0 [0-0.01]           | 0.28         |
| [ <i>Prevotella</i> ] unclassified spp.         | 1.49 [0.65-7.39]     | 0.31 [0.04-3.47]     | 0.07         |
| <i>Bacteroides</i> unclassified spp.            | 0 [0-0.02]           | 0.01 [0-0.13]        | 0.093        |
| <i>Bacteroides</i> unclassified spp.            | 8.13 [2.7-14.85]     | 7.54 [1.9-16.25]     | 0.874        |
| <i>Bacteroides fragilis</i>                     | 0 [0-0]              | 0 [0-0]              | 0.875        |
| <i>Bacteroides ovatus</i>                       | 0 [0-0]              | 0 [0-0.02]           | 0.099        |
| <i>Bacteroides plebeius</i>                     | 0.84 [0.14-2.11]     | 0.19 [0.02-1.09]     | 0.096        |
| <b><i>Bacteroides uniformis</i></b>             | <b>0 [0-0]</b>       | <b>0 [0-0.05]</b>    | <b>0.033</b> |
| <i>Parabacteroides</i> unclassified spp.        | 0 [0-0.01]           | 0 [0-0.05]           | 0.058        |
| <b><i>Parabacteroides distasonis</i></b>        | <b>0 [0-0]</b>       | <b>0 [0-0.01]</b>    | <b>0.038</b> |
| <i>Prevotella copri</i>                         | 0.32 [0.02-6.93]     | 0.04 [0.03-3.66]     | 0.649        |
| <i>Bacteroidales S24-7</i> unclassified spp.    | 0 [0-0]              | 0 [0-0]              | 0.624        |
| <b>Firmicutes</b>                               |                      |                      |              |
| <i>Staphylococcus</i> unclassified spp.         | 0 [0-0]              | 0 [0-0]              | 0.127        |
| <b><i>Enterococcaceae</i> unclassified spp.</b> | <b>0 [0-0.01]</b>    | <b>0.02 [0-0.19]</b> | <b>0.01</b>  |
| <i>Lactobacillus</i> unclassified spp.          | 0.02 [0.02-0.03]     | 0.03 [0.02-0.04]     | 0.07         |
| <i>Lactobacillus</i> unclassified spp.          | 0 [0-0]              | 0 [0-0]              | 0.32         |
| <i>Leuconostoc</i> unclassified spp.            | 0 [0-0.01]           | 0 [0-0.01]           | 0.584        |
| <i>Streptococcus</i> unclassified spp.          | 0 [0-0]              | 0 [0-0]              | 0.212        |
| <i>Streptococcus luteciae</i>                   | 0.05 [0.02-0.09]     | 0.05 [0.02-0.21]     | 0.582        |
| <i>Turicibacter</i> unclassified spp.           | 0.39 [0.09-1.01]     | 0.08 [0.03-1.16]     | 0.304        |
| <i>Clostridiales</i> unclassified spp. 1        | 0 [0-0]              | 0 [0-0.04]           | 0.074        |
| <i>Clostridiales</i> unclassified spp. 2        | 0.01 [0-0.09]        | 0.02 [0-0.22]        | 0.239        |
| [ <i>Mogibacteriaceae</i> ] unclassified spp.   | 0 [0-0]              | 0 [0-0.02]           | 0.224        |
| <i>Clostridiaceae</i> unclassified spp.         | 0 [0-0.05]           | 0 [0-0.06]           | 0.466        |
| <i>Clostridiaceae</i> unclassified spp.         | 0 [0-0]              | 0 [0-0]              | 0.583        |
| <i>Clostridium</i> unclassified spp.            | 0.03 [0-0.38]        | 0.04 [0-0.6]         | 0.836        |
| <i>Clostridium hiranonis</i>                    | 18.17 [7.68-27.1]    | 10.34 [3.82-17.75]   | 0.058        |
| <i>Clostridium perfringens</i>                  | 0.23 [0.09-0.75]     | 0.31 [0.1-4.69]      | 0.357        |
| <i>Sarcina</i> unclassified spp.                | 0 [0-0.02]           | 0 [0-0.03]           | 0.841        |
| <i>Clostridiaceae SMB53</i> unclassified spp.   | 0.1 [0-0.45]         | 0.02 [0-0.77]        | 0.948        |
| <i>Lachnospiraceae</i> unclassified spp.        | 0.81 [0.32-1.41]     | 0.71 [0.46-1.37]     | 0.634        |
| <i>Lachnospiraceae</i>                          | 1.25 [0.6-1.94]      | 0.86 [0.27-1.55]     | 0.315        |
| [ <i>Ruminococcus</i> ] unclassified spp.       | 0.16 [0.06-0.42]     | 0.12 [0.06-0.48]     | 0.791        |
| [ <i>Ruminococcus</i> ] <i>gnavus</i>           | 1.51 [0.52-2.82]     | 0.99 [0.5-1.7]       | 0.415        |
| [ <i>Ruminococcus</i> ] <i>torques</i>          | 0.05 [0-0.17]        | 0 [0-0.11]           | 0.348        |
| <i>Blautia</i> unclassified spp. 1              | 0.46 [0.35-1.7]      | 0.38 [0.09-0.93]     | 0.38         |
| <i>Blautia</i> unclassified spp. 2              | 0.99 [0.59-2.57]     | 0.92 [0.23-1.84]     | 0.452        |
| <i>Blautia producta</i>                         | 1.9 [1.48-4.57]      | 1.85 [0.99-5.93]     | 0.546        |
| <b><i>Clostridium</i> unclassified spp.</b>     | <b>0.03 [0-0.11]</b> | <b>0 [0-0.02]</b>    | <b>0.034</b> |
| <i>Clostridium colinum</i>                      | 0 [0-0]              | 0 [0-0.03]           | 0.354        |
| <i>Coprococcus</i> unclassified spp.            | 0 [0-0.03]           | 0 [0-0.04]           | 0.811        |
| <i>Dorea</i> unclassified spp.                  | 2.03 [1.16-2.37]     | 1.42 [0.66-4.02]     | 0.634        |
| <i>Epulopiscium</i> unclassified spp.           | 0 [0-0]              | 0 [0-0.03]           | 0.206        |
| <b><i>Roseburia</i> unclassified spp.</b>       | <b>0 [0-0.04]</b>    | <b>0.04 [0-0.14]</b> | <b>0.025</b> |
| <i>Peptococcus</i> unclassified spp.            | 0 [0-0.04]           | 0.01 [0-0.68]        | 0.16         |
| <i>Peptostreptococcaceae</i> unclassified spp.  | 0.09 [0.02-0.46]     | 0.12 [0.01-0.97]     | 0.678        |
| <i>Peptostreptococcaceae</i> unclassified spp.  | 0.31 [0.07-0.83]     | 0.33 [0.04-1.28]     | 0.975        |
| [ <i>Clostridium</i> ] <i>sordellii</i>         | 0 [0-0.11]           | 0.02 [0-0.42]        | 0.316        |

|                                                     |                         |                         |              |
|-----------------------------------------------------|-------------------------|-------------------------|--------------|
| <i>Ruminococcaceae</i> unclassified spp.            | 0.12 [0.03-0.28]        | 0.06 [0.01-0.12]        | 0.134        |
| <i>Ruminococcaceae</i> unclassified spp.            | 0.27 [0.11-0.52]        | 0.19 [0.04-0.89]        | 0.832        |
| <i>Butyrivococcus pullicaecorum</i>                 | 0.06 [0.01-0.13]        | 0.04 [0.01-0.1]         | 0.544        |
| <i>Faecalibacterium prausnitzii</i>                 | 1.58 [0.23-3.31]        | 0.13 [0.04-2.78]        | 0.074        |
| <i>Oscillospira</i> unclassified spp.               | 0.01 [0-0.05]           | 0.02 [0-0.12]           | 0.721        |
| <i>Ruminococcus</i> unclassified spp.               | 0.01 [0-0.04]           | 0.04 [0.01-0.08]        | 0.168        |
| <i>Dialister</i> unclassified spp.                  | 0 [0-0]                 | 0 [0-0]                 | 0.179        |
| <i>Megamonas</i> unclassified spp.                  | 0.54 [0.12-2.76]        | 0.39 [0.06-2.03]        | 0.518        |
| <i>Phascolarctobacterium</i> unclassified spp.      | 0.13 [0.01-0.59]        | 0.19 [0-0.52]           | 0.949        |
| <i>Erysipelotrichaceae</i> unclassified spp.        | 0 [0-0.02]              | 0 [0-0]                 | 0.194        |
| <b><i>Erysipelotrichaceae</i> unclassified spp.</b> | <b>0.21 [0.07-0.55]</b> | <b>0.01 [0-0.11]</b>    | <b>0.008</b> |
| <b>[<i>Eubacterium</i>] <i>biforme</i></b>          | <b>0.21 [0.01-1.06]</b> | <b>0.01 [0.01-0.16]</b> | <b>0.028</b> |
| [ <i>Eubacterium</i> ] <i>dolichum</i>              | 0.05 [0.01-0.09]        | 0.03 [0-0.14]           | 0.823        |
| <b><i>Allobaculum</i> unclassified spp.</b>         | <b>0.69 [0.1-1.43]</b>  | <b>0.27 [0.03-0.8]</b>  | <b>0.038</b> |
| <b><i>Catenibacterium</i> unclassified spp.</b>     | <b>0.14 [0.05-3.3]</b>  | <b>0.03 [0.02-0.21]</b> | <b>0.032</b> |
| <b><i>Clostridium cocleatum</i></b>                 | <b>0.1 [0.02-0.17]</b>  | <b>0.04 [0-0.11]</b>    | <b>0.028</b> |
| <i>Clostridium saccharogumia</i>                    | 0 [0-0]                 | 0 [0-0.01]              | 0.105        |
| <i>Coprobacillus</i> unclassified spp.              | 0 [0-0.04]              | 0 [0-0.05]              | 0.898        |
| <b>Fusobacteria</b>                                 |                         |                         |              |
| <i>Fusobacteriaceae</i> unclassified spp.           | 1.3 [0.4-3.92]          | 0.83 [0-2.2]            | 0.257        |
| <i>Fusobacteriaceae</i> unclassified spp.           | 16.49 [12.48-29.33]     | 11.29 [6.21-20.09]      | 0.097        |
| <i>Cetobacterium somerae</i>                        | 0 [0-0]                 | 0 [0-0.01]              | 0.224        |
| <i>Fusobacterium</i> unclassified spp.              | 4.3 [2.5-8.02]          | 3.57 [1.1-10.36]        | 0.604        |
| <b>Proteobacteria</b>                               |                         |                         |              |
| <i>Sutterella</i> unclassified spp.                 | 1.33 [0.36-2.99]        | 1.11 [0.31-2.53]        | 0.664        |
| <i>Bilophila</i> unclassified spp.                  | 0 [0-0]                 | 0 [0-0]                 | 0.091        |
| <i>Desulfovibrio</i> unclassified spp.              | 0 [0-0]                 | 0 [0-0]                 | 0.091        |
| <i>Campylobacter</i> unclassified spp.              | 0 [0-0.09]              | 0 [0-0.05]              | 0.709        |
| <i>Helicobacteraceae</i> unclassified spp.          | 0 [0-0]                 | 0 [0-0.05]              | 0.156        |
| <i>Flexispira</i> unclassified spp.                 | 0 [0-0.15]              | 0 [0-0.03]              | 0.214        |
| <i>Helicobacter</i> unclassified spp.               | 0 [0-0.04]              | 0 [0-0]                 | 0.404        |
| <i>Aeromonadaceae</i> unclassified spp.             | 0 [0-0]                 | 0 [0-0]                 | 0.339        |
| <i>Succinivibrionaceae</i> unclassified spp.        | 0.03 [0-0.31]           | 0.02 [0-0.08]           | 0.79         |
| <i>Anaerobiospirillum</i> unclassified spp.         | 0.01 [0-0.46]           | 0.01 [0-0.44]           | 0.886        |
| <i>Succinivibrio</i> unclassified spp.              | 0 [0-0]                 | 0 [0-0]                 | 0.127        |
| <b><i>Enterobacteriaceae</i> unclassified spp.</b>  | <b>0.07 [0.04-0.22]</b> | <b>0.3 [0.11-3.49]</b>  | <b>0.002</b> |
| <b><i>Escherichia coli</i></b>                      | <b>0 [0-0]</b>          | <b>0 [0-0.01]</b>       | <b>0.033</b> |

**Supplementary Table S3.** Taxa analysis at the Phylum level. The median percentage abundance [IQR] is displayed for the control, left congestive heart failure (LCHF), right congestive heart failure (RCHF) and biventricular congestive heart failure (BiCHF) groups. BiCHF group was not included in the statistical analysis due to the small number. The results are displayed as median [25<sup>th</sup>, 75<sup>th</sup> percentiles].

| Phylum             | Control (n=15)   | LCHF (n=16)      | RCHF (n=15)      | BiCHF (n=4)      | p value |
|--------------------|------------------|------------------|------------------|------------------|---------|
| Firmicutes (%)     | 46.8 [36.7-57.0] | 51.5 [32.9-61.7] | 42.2 [31.1-58.8] | 63.2 [32.6-72.0] | 0.608   |
| Fusobacteria (%)   | 25.8 [19.6-36.6] | 20.5 [11.5-29.6] | 23.1 [12.3-36.8] | 11.2 [2.6-45.2]  | 0.313   |
| Bacteroides (%)    | 17.7 [10.1-25.2] | 23.9 [6.8-29.7]  | 15.9 [2.5-27.6]  | 17.9 [4.3-21.8]  | 0.919   |
| Proteobacteria (%) | 2.6 [1.0-4.9]    | 7.0 [1.6-13.0]   | 6.7 [2.4-8.5]    | 5.4 [3.0-18.0]   | 0.104   |
| Actinobacteria (%) | 0.6 [0.2-1.7]    | 0.8 [0.2-2.6]    | 0.8 [0.6-1.5]    | 0.9 [0.2-1.8]    | 0.963   |

## Supplementary Figures

**Supplementary Figure S1.** Comparison of alpha (A, C and E) and beta diversity (B, D and F) between the control vs congestive heart failure (CHF) groups (A and B); control vs CHF dogs living alone vs CHF dogs living with other dogs (C and D); and control living with CHF dogs vs CHF dogs living with healthy control dogs (E and F). The remaining dogs in the graphs E and F are still displayed for visual interpretation but not included in the statistical analysis. The line in the alpha rarefaction curves marks the mean and the error bars mark the standard deviation. The principle coordinate analysis plot shows the results of Bray-Curtis dissimilarity analysis.

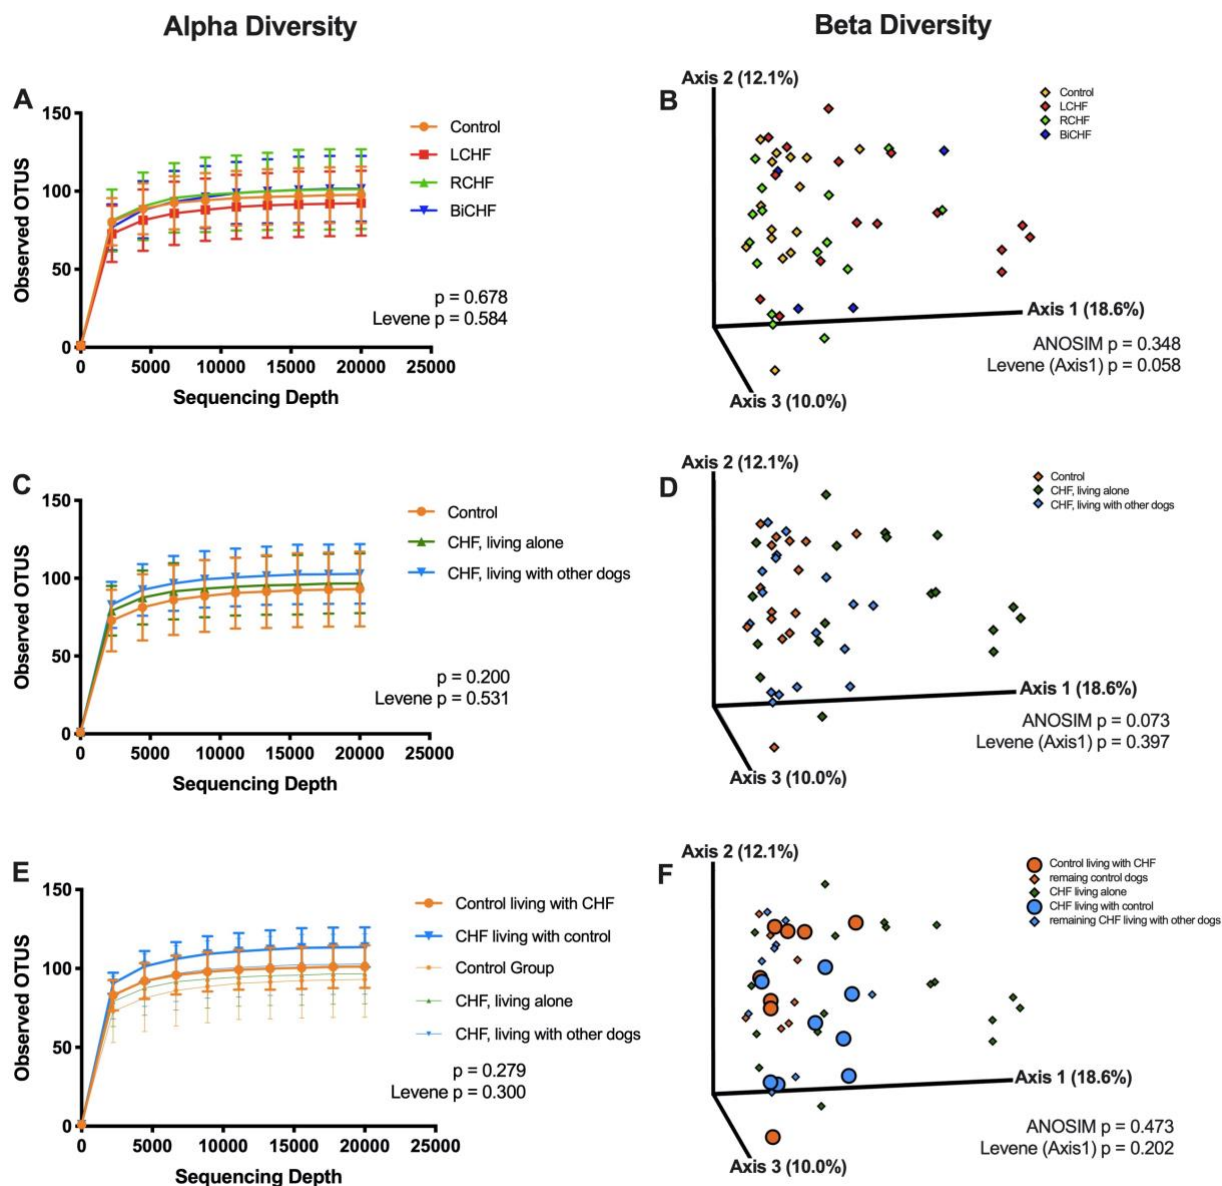

Supplement: 41598_2020_70826_MOESM1_ESM.pdf [file 41598_2020_70826_MOESM1_ESM.pdf]
